# Supplementary material for: Anti-α-enolase Antibodies in Serum from Pediatric Patients Affected by Inflammatory Diseases: Diagnostic and Pathogenetic Insights
Source: Hindawi journal article supplement (doi:10.1155/2011/870214), 2011-01-01
Supplement: f1 [file 870214.f1.pdf]

**Supplementary data S1. T-test results from comparison within patients groups.** Patients AAE levels are compared within the different cohorts by t-test and p value were reported. In the right side of the table were reported results for AAE IgG, whereas in the left side the ones for AAE IgA. In bold are indicated  $p < 0.05$ .

| igA \ igG | JIA              | CD               | CrD               | HPF          | PFAPA             |
|-----------|------------------|------------------|-------------------|--------------|-------------------|
| JIA       |                  | <b>0.006</b>     | 0.879             | 0.461        | <b>9.1 exp-14</b> |
| CD        | 0.294            |                  | <b>0.003</b>      | <b>0.025</b> | <b>2.1 exp-15</b> |
| CrD       | 0.724            | 0.332            |                   | 0.520        | <b>2.5 exp-17</b> |
| HPF       | 0.481            | 0.176            | 0.341             |              | <b>2.4 exp-6</b>  |
| PFAPA     | <b>4.1 exp-5</b> | <b>2.0 exp-4</b> | <b>9.2 exp-10</b> | <b>0.004</b> |                   |
